# Supplementary material for: Accurate prediction of cell type-specific transcription factor binding
Source: PubMed Central journal article supplement (PMC6327544; doi:10.1186/s13059-018-1614-y), 2019-01-10
Supplement: 13059_2018_1614_MOESM1_ESM.pdf [file 13059_2018_1614_MOESM1_ESM.pdf]

**Supplementary material**  
**“Accurate prediction of cell type-specific  
transcription factor binding”**

Jens Keilwagen, Stefan Posch, Jan Grau

**Table S1:** Previous approaches for predicting *in-vivo* transcription factor binding sites and their properties, listed in chronological order.

| Approach        | Motifs                              | Accessibility                          | additional Features                                                                              | Learning                                        | Model                                       | specifics                                                                   |
|-----------------|-------------------------------------|----------------------------------------|--------------------------------------------------------------------------------------------------|-------------------------------------------------|---------------------------------------------|-----------------------------------------------------------------------------|
| CENTiPEDE [1]   | PWMs (TRANS-Jaspar), de-novo k-mers | DNase-seq                              | histone modifications                                                                            | unsupervised                                    | hierarchical mixture model                  | first predict motifs then matched to DNase-seq profiles                     |
| [2]             | PWMs (TRANS-Jaspar, UniProbe)       | DNase-seq                              |                                                                                                  | supervised                                      | Sparse logistic regression                  | predict gene regulation                                                     |
| [3]             | k-mer based                         | DNase-seq                              | histone modifications                                                                            | supervised                                      | SVMs                                        | cell type-specific binding motifs                                           |
| Millipede [4]   | PWMs (TRANS-Jaspar)                 | DNase-seq                              |                                                                                                  | supervised                                      | logistic regression                         | same motifs as CENTiPEDE, binned DNase-seq cuts                             |
| Wellington [5]  | PWMs (Homer)                        | DNase-seq                              |                                                                                                  | -                                               | based on statistical tests                  | strand specific cut profiles                                                |
| PIQ [6]         | PWMs (TRANS-Jaspar, UniProbe)       | DNase-seq                              |                                                                                                  | unsupervised                                    | probabilistic model                         | first predict motifs then matched to DNase-seq profiles, high resolution    |
| [7]             | PWMs (TRANS-Jaspar, UniProbe)       | DNase-seq                              | histone modifications                                                                            | unsupervised                                    | Hidden Markov model                         | active footprints annotated with motifs                                     |
| msCentipede [8] | PWMs (from SELEX)                   | DNase-seq, ATAC-seq                    |                                                                                                  | unsupervised                                    | hierarchical model                          | explicitly models heterogeneities in cut profiles                           |
| BinDNase [9]    | PWMs (Factorbook)                   | DNase-seq                              |                                                                                                  | supervised                                      | logistic regression                         | high resolution, DNase-seq signal TF-specific                               |
| [10]            | PWMs (Jaspar)                       | DNase-seq                              | <i>in-silico</i> nucleosome occupancy, structural features, conservation, ChIP-seq of co-factors | supervised                                      | SVMs                                        | also regression                                                             |
| Romulus [11]    | motif matches (Homer)               | DNase-seq                              | (histone modifications, conservation)                                                            | unsupervised (EM)                               | probabilistic model                         | motif matches used as prior information                                     |
| FactorNet [12]  | convolutional neural network        | DNase-seq                              | mappability, annotations, CpG islands, expression                                                | supervised (Deep learning)                      | convolutional-recurrent neural network      | motif discovery part of deep learning                                       |
| [13]            | PWMs (TRANS-FAC)                    | DNase-seq (ATAC-seq)                   | conservation, distance to TSS                                                                    | supervised                                      | Random forests                              | model based on motif and DNase may be transferred across cell types and TFs |
| TFImpute [14]   | convolutional neural network        | (DNase-seq: negative training regions) |                                                                                                  | supervised (Deep learning), multi-task learning | deep neural network                         | complete matrix of cell type-TF combinations                                |
| TEPIC [15]      | PWMs (Jaspar, UniProbe)             | DNase-seq                              | (histone modifications)                                                                          | -                                               | TRAP scores with exponential distance prior | predict gene expression using elastic net                                   |
| Mocap [16]      | PWMs (ENCODE, CisBP)                | DNase-seq                              | GC/CpG-content, mappability, distance to TSS, conservation                                       | supervised                                      | sparse logistic regression                  | three-stage model, ensemble classifier                                      |

**Table S2:** Final ranking of the ENCODE-DREAM challenge, reproduced from <https://www.synapse.org/#!Synapse:syn6131484/wiki/405275>. Briefly, final ranks are obtained by i) measuring performance in 10 bootstrap samples for each TF/cell type, ii) computing a normalized rank per bootstrap sample across all performance measures yielding 10 ranks per TF/cell type, iii) obtaining the total score per bootstrap sample as the average relative rank across all TFs/cell types in that bootstrap sample. The final total rank is the 90th percentile of average relative ranks across bootstrap samples per team. In addition, the lower bound, mean, and upper bound of the average relative ranks across bootstrap samples are listed.

| Team name     | rank | Lower bound | Mean | Upperbound |
|---------------|------|-------------|------|------------|
| Yuanfang Guan | 1.00 | 0.15        | 0.16 | 0.17       |
| J-Team        | 1.00 | 0.16        | 0.16 | 0.17       |
| dxquang       | 3.00 | 0.22        | 0.23 | 0.24       |
| adbc          | 4.00 | 0.31        | 0.32 | 0.33       |
| autosome.ru   | 5.00 | 0.32        | 0.33 | 0.34       |

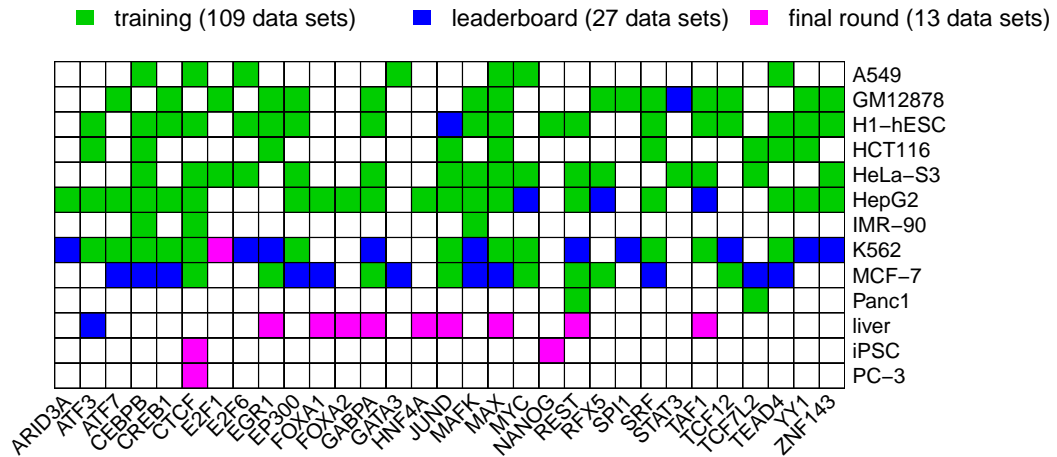

**Fig. S1:** Overview of the combinations of cell type and TF in the ENCODE-DREAM training, leaderboard, and final round sets.

**Table S3:** Ranking per TF/cell type in the ENCODE-DREAM challenge, reproduced from <https://www.synapse.org/#!Synapse:syn6131484/wiki/405275>, including the approach proposed in this paper (J-Team). Ranks per TF/cell type are obtained by i) measuring performance in 10 bootstrap samples for each TF/cell type, ii) computing a normalized rank per bootstrap sample across all performance measures yielding 10 ranks per TF/cell type. The final rank of each team per TF/cell type is the 90th percentile of the bootstrap ranks. Performance measures listed in the table are those obtained for the first bootstrap sample. Hence, the AUC-PR values reported for the approach proposed in this paper (J-Team) may slightly deviate from the AUC-PR values reported on the complete test data sets.

| Rank               | Team name       | AUC-ROC        | AUC-PR         | Recall@50% FDR  | Recall@10% FDR    |
|--------------------|-----------------|----------------|----------------|-----------------|-------------------|
| <b>CTCF PC-3</b>   |                 |                |                |                 |                   |
| 1                  | dxquang         | 0.986217330227 | 0.782687521556 | 0.794840790004  | 0.613365022446    |
| 2                  | J-Team          | 0.975077470338 | 0.753448891593 | 0.763318461688  | 0.584330567485    |
| 3                  | davidaknowles   | 0.932199241358 | 0.69657574109  | 0.763846613574  | 0.396058319087    |
| 3                  | yuanfang.guan   | 0.963107525421 | 0.607931868275 | 0.596853326662  | 0.391499534392    |
| 5                  | adbc            | 0.951471924802 | 0.550438500262 | 0.523759885474  | 0.331915662483    |
| <b>CTCF iPSC</b>   |                 |                |                |                 |                   |
| 1                  | dxquang         | 0.996617775166 | 0.860776696902 | 0.914165873908  | 0.684273112514    |
| 2                  | davidaknowles   | 0.995968442285 | 0.832481209884 | 0.881129464672  | 0.63698867076     |
| 3                  | J-Team          | 0.994996088948 | 0.81649114036  | 0.856525123238  | 0.595260745481    |
| 4                  | autosome.ru     | 0.992669982956 | 0.780153493659 | 0.80621378535   | 0.556127302603    |
| 4.5                | adbc            | 0.993205095789 | 0.777274654504 | 0.809413646977  | 0.536928132837    |
| <b>E2F1 K562</b>   |                 |                |                |                 |                   |
| 1                  | J-Team          | 0.992979168355 | 0.427395726529 | 0.37462406015   | 0.00507518796992  |
| 2                  | Ramil Nurtdinov | 0.960490758995 | 0.365892167914 | 0.342763157895  | 0.0113721804511   |
| 3                  | adbc            | 0.99226015265  | 0.35103497284  | 0.288063909774  | 0.000281954887218 |
| 3                  | yuanfang.guan   | 0.995770339176 | 0.352142995523 | 0.232612781955  | 0.0               |
| 5                  | autosome.ru     | 0.991932293435 | 0.353042157779 | 0.188909774436  | 0.000281954887218 |
| <b>EGR1 liver</b>  |                 |                |                |                 |                   |
| 1                  | yuanfang.guan   | 0.994078143398 | 0.428921587617 | 0.420699846941  | 0.000633345648388 |
| 1                  | J-Team          | 0.991594481586 | 0.398903018922 | 0.296880772682  | 0.0335673193645   |
| 3                  | adbc            | 0.991644480391 | 0.327827982558 | 0.179659048926  | 0.00902517548952  |
| 3                  | autosome.ru     | 0.987949560195 | 0.364234620215 | 0.238824088246  | 0.0229587797541   |
| 5                  | dxquang         | 0.985555420923 | 0.317247143546 | 0.216445875336  | 0.0286061117855   |
| <b>FOXA1 liver</b> |                 |                |                |                 |                   |
| 1                  | dxquang         | 0.986197386068 | 0.492221458375 | 0.488928008895  | 0.109978689892    |
| 1.5                | J-Team          | 0.977418496248 | 0.488358001587 | 0.520383581951  | 0.110534605763    |
| 3                  | yuanfang.guan   | 0.970606845661 | 0.376415921821 | 0.352774946725  | 0.0358565737052   |
| 4                  | adbc            | 0.960870162105 | 0.337086720813 | 0.311312887983  | 0.0406281849347   |
| 5                  | autosome.ru     | 0.949911341567 | 0.309891024981 | 0.282358936348  | 0.0412767534513   |
| <b>FOXA2 liver</b> |                 |                |                |                 |                   |
| 1                  | yuanfang.guan   | 0.980036667035 | 0.460677694553 | 0.474909628017  | 0.0418626345862   |
| 2                  | J-Team          | 0.971150659879 | 0.38702712923  | 0.350021378318  | 0.102499319781    |
| 3                  | adbc            | 0.967708826097 | 0.340741341767 | 0.287480079294  | 0.0339720915769   |
| 4                  | Ramil Nurtdinov | 0.93620672598  | 0.363007956194 | 0.33711664788   | 0.00754071597932  |
| 5                  | autosome.ru     | 0.959178221089 | 0.314581875275 | 0.257433824387  | 0.0171803941385   |
| <b>GABPA liver</b> |                 |                |                |                 |                   |
| 1                  | yuanfang.guan   | 0.991145376858 | 0.470382944432 | 0.391867905057  | 0.126109391125    |
| 2                  | dxquang         | 0.986077155658 | 0.441611731485 | 0.355005159959  | 0.145758513932    |
| 2.5                | J-Team          | 0.982405992145 | 0.422831231929 | 0.360743034056  | 0.161981424149    |
| 4                  | autosome.ru     | 0.98336758817  | 0.443663093608 | 0.369742002064  | 0.0894117647059   |
| 5                  | adbc            | 0.980361549368 | 0.364394213755 | 0.281898864809  | 0.0951083591331   |
| <b>HNF4A liver</b> |                 |                |                |                 |                   |
| 1                  | dxquang         | 0.978494318401 | 0.618836893234 | 0.646708673306  | 0.24835215889     |
| 2                  | J-Team          | 0.971615180489 | 0.595929549214 | 0.610485205726  | 0.270928308023    |
| 3                  | yuanfang.guan   | 0.966758766328 | 0.585605500165 | 0.591219257237  | 0.293635122971    |
| 4                  | adbc            | 0.961352809308 | 0.529986835084 | 0.558625395627  | 0.158294375563    |
| 5                  | davidaknowles   | 0.966070765102 | 0.509607901615 | 0.539344928715  | 0.0959087081506   |
| <b>JUND liver</b>  |                 |                |                |                 |                   |
| 1                  | yuanfang.guan   | 0.988833629534 | 0.59872470682  | 0.662027048361  | 0.112271746566    |
| 2                  | J-Team          | 0.978403674237 | 0.422307544136 | 0.385781192443  | 0.0720149450087   |
| 2.5                | autosome.ru     | 0.97704232964  | 0.447356000712 | 0.423722570121  | 0.0481766036942   |
| 4                  | adbc            | 0.978748188296 | 0.367579456428 | 0.272720096827  | 0.0355996421618   |
| 5                  | HINT            | 0.9561941256   | 0.367828291983 | 0.284113034784  | 0.0543072146503   |
| <b>MAX liver</b>   |                 |                |                |                 |                   |
| 1                  | yuanfang.guan   | 0.991746814903 | 0.535399657046 | 0.588478989939  | 0.0153876504241   |
| 2                  | HINT            | 0.95997584562  | 0.440231369964 | 0.481628526337  | 0.00969126060367  |
| 2                  | autosome.ru     | 0.982767662617 | 0.473930602296 | 0.505942986782  | 0.00724995068061  |
| 4                  | J-Team          | 0.985255809252 | 0.447635741394 | 0.458399092523  | 0.00342769777076  |
| 4                  | davidaknowles   | 0.988468222643 | 0.429393844769 | 0.414554152693  | 0.000493193923851 |
| <b>NANOG iPSC</b>  |                 |                |                |                 |                   |
| 1                  | dxquang         | 0.988513719636 | 0.353926718784 | 0.311808986121  | 0.00317572335921  |
| 2                  | yuanfang.guan   | 0.989553792922 | 0.308691209204 | 0.244648318043  | 0.0399905904493   |
| 3                  | J-Team          | 0.987454494921 | 0.315239838124 | 0.266055045872  | 0.0278757939308   |
| 4                  | autosome.ru     | 0.983177611442 | 0.195105149801 | 0.0782168901435 | 0.0159962361797   |
| 5                  | HINT            | 0.977119267757 | 0.209531929706 | 0.11714890614   | 0.0               |
| <b>REST liver</b>  |                 |                |                |                 |                   |
| 1                  | dxquang         | 0.980045420537 | 0.412170318171 | 0.406472168723  | 0.0281047150296   |
| 2                  | HINT            | 0.936732703562 | 0.411905089056 | 0.406686164016  | 0.0308628765723   |
| 3                  | yuanfang.guan   | 0.97069508862  | 0.39782135426  | 0.350880947286  | 0.00366169722044  |
| 4                  | J-Team          | 0.96290735932  | 0.264076103071 | 0.0605606676653 | 0.0317901895047   |
| 4                  | NittanyLions    | 0.81063427363  | 0.401257426838 | 0.499369902751  | 0.0               |
| <b>TAF1 liver</b>  |                 |                |                |                 |                   |
| 1                  | yuanfang.guan   | 0.9917037538   | 0.437342094864 | 0.407124543124  | 0.000272761987889 |
| 2                  | J-Team          | 0.990046815991 | 0.412563658303 | 0.382521411816  | 0.0019638863128   |
| 3                  | adbc            | 0.991108118397 | 0.401538933991 | 0.34166166603   | 0.000163657192734 |
| 3                  | dxquang         | 0.989179476303 | 0.428313969763 | 0.403851399269  | 0.0               |
| 5                  | HINT            | 0.963369400393 | 0.28588792284  | 0.189242267198  | 0.00300038186678  |

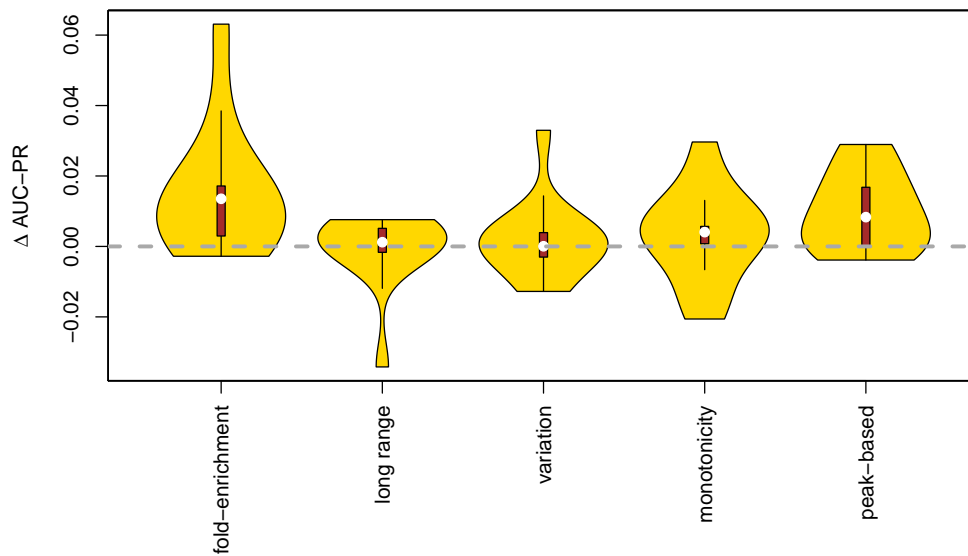

**Fig. S2:** Assessment of the importance of different groups of DNase features by excluding the respective group of features from the training data. The measure  $\Delta \text{AUC-PR}$  is computed as the difference of AUC-PR with all features included and AUC-PR with one group of features left out. Hence, positive values indicates that the inclusion of a specific group of features leads to an improvement in prediction performance. In general, we find that excluding any of the groups has only minor impact on performance. This is likely due to wide redundancies and correlations among the different DNase features, which may help to compensate for the loss of a specific group.

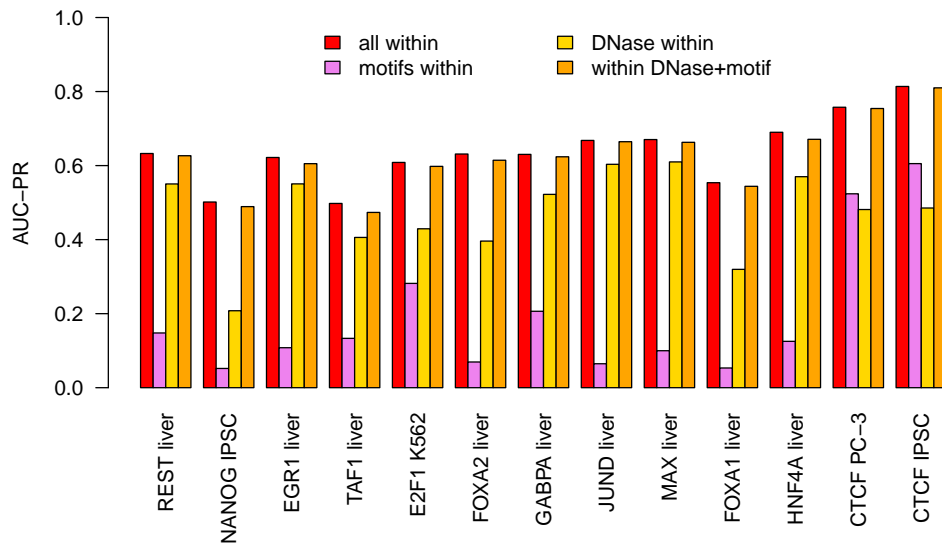

**Fig. S3:** Within cell type performance. For each of the 13 combinations of TF and cell type within the test data, we compute the prediction performance (AUC-PR) on the held-out chromosomes of classifiers i) using all features considered, ii) using only motif-based features, iii) using only DNase-seq-based features, and iv) using only motif-based and DNase-seq-based features. The training data comprises the training chromosomes of the same (test) cell type, while predictions are made for the held-out test chromosomes of that cell type.

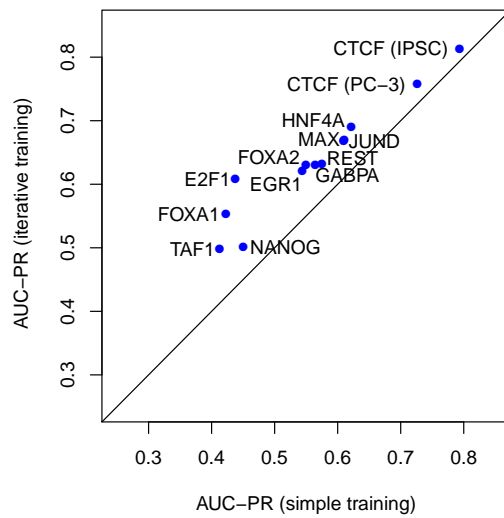

**Fig. S4:** Relevance of the iterative training procedure for within cell type predictions. For each of the 13 test data sets, we compare the performance (AUC-PR) achieved by the (set of) classifier(s) trained on the initial negative regions (abscissa) with the performance achieved by averaging over all classifiers from the iterative training procedure (ordinate). The training data comprises the training chromosomes of the same (test) cell type, while predictions are made for the held-out test chromosomes of that cell type.

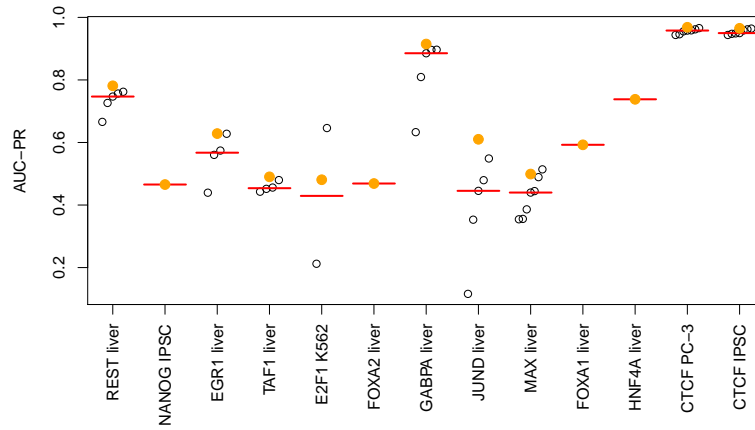

A

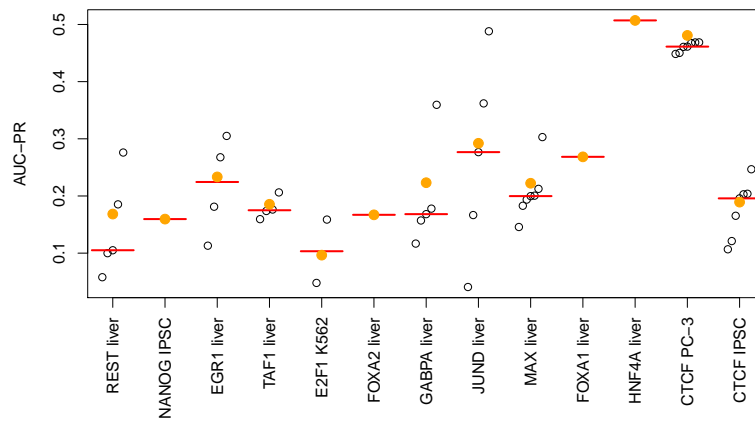

B

**Fig. S5:** Assessment of prediction performance separately on regions conserved (A) and variable (B) among cell types. We consider a bound region conserved if it is also labeled as “bound” in at least 3 of 4 training cell types, and we consider a bound region as variable if this region is also labeled as “bound” in at most 1 of 4 training cell types. For each of the 13 test data sets, we compare the performance (AUC-PR) of the individual classifiers trained on single cell types (open circles) to that of the ensemble classifier averaging over all classifiers trained on all training cell types (filled, orange circles). As a reference, we also plot the median of the individual classifiers as a red bar.



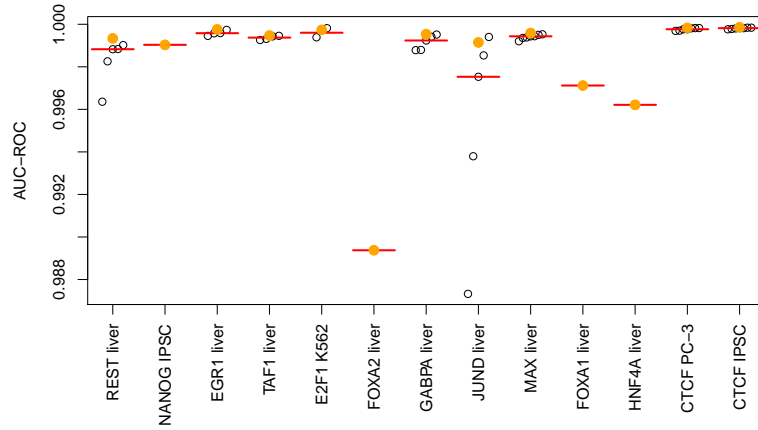

A

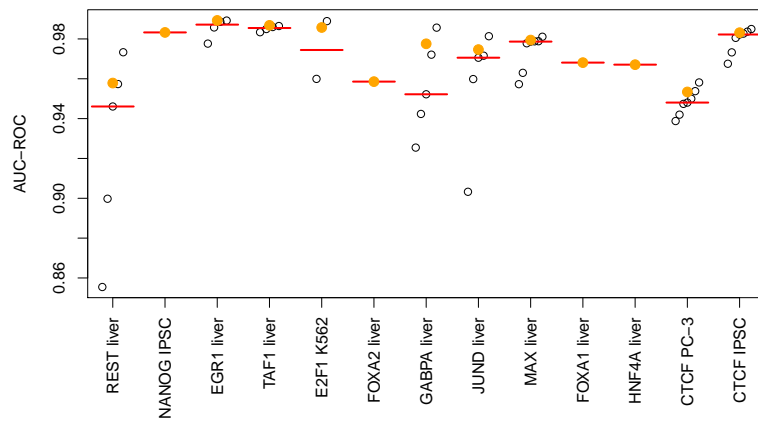

B

**Fig. S6:** Assessment of prediction performance separately on regions conserved (A) and variable (B) among cell types. We consider a bound region conserved if it is also labeled as “bound” in at least 3 of 4 training cell types, and we consider a bound region as variable if this region is also labeled as “bound” in at most 1 of 4 training cell types. For each of the 13 test data sets, we compare the performance (AUC-ROC) of the individual classifiers trained on single cell types (open circles) to that of the ensemble classifier averaging over all classifiers trained on all training cell types (filled, orange circles). As a reference, we also plot the median of the individual classifiers as a red bar.

**Table S4:** Performance (AUC-PR) on the test cell types using different sets of features. Columns “all features”, “motif-based”, “DNase-seq-based”, and “motif & DNase-seq-based” correspond to classifiers using only those feature sets, while columns with prefix “w/o” indicate that the given feature set has been excluded when training the classifiers (for details see main text, Figures 3 and 4).

| TF    | cell type | all features | motif-based | DNase-seq-based | motif & DNase-seq-based | w/o DNase | w/o motifs | w/o de-novo motifs | w/o Slim/Lsim motifs | w/o RNA-seq | w/o annotation | w/o sequence |
|-------|-----------|--------------|-------------|-----------------|-------------------------|-----------|------------|--------------------|----------------------|-------------|----------------|--------------|
| CTCF  | IPSC      | 0.807        | 0.5989      | 0.479           | 0.806                   | 0.6028    | 0.576      | 0.763              | 0.778                | 0.807       | 0.807          | 0.807        |
| CTCF  | PC-3      | 0.747        | 0.5202      | 0.487           | 0.745                   | 0.5307    | 0.572      | 0.707              | 0.721                | 0.747       | 0.747          | 0.746        |
| E2F1  | K562      | 0.388        | 0.2287      | 0.390           | 0.382                   | 0.3017    | 0.326      | 0.366              | 0.382                | 0.384       | 0.390          | 0.385        |
| EGR1  | liver     | 0.377        | 0.0937      | 0.435           | 0.376                   | 0.1242    | 0.354      | 0.366              | 0.375                | 0.375       | 0.377          | 0.378        |
| FOXA1 | liver     | 0.487        | 0.0538      | 0.259           | 0.482                   | 0.0713    | 0.321      | 0.458              | 0.478                | 0.487       | 0.488          | 0.482        |
| FOXA2 | liver     | 0.392        | 0.0460      | 0.338           | 0.397                   | 0.0642    | 0.358      | 0.443              | 0.426                | 0.396       | 0.392          | 0.391        |
| GABPA | liver     | 0.410        | 0.1868      | 0.390           | 0.413                   | 0.2289    | 0.391      | 0.412              | 0.409                | 0.409       | 0.411          | 0.414        |
| HNF4A | liver     | 0.587        | 0.1110      | 0.430           | 0.577                   | 0.1471    | 0.509      | 0.573              | 0.573                | 0.586       | 0.586          | 0.579        |
| JUND  | liver     | 0.420        | 0.0446      | 0.525           | 0.425                   | 0.0588    | 0.499      | 0.438              | 0.435                | 0.418       | 0.419          | 0.427        |
| MAX   | liver     | 0.424        | 0.0654      | 0.485           | 0.426                   | 0.0928    | 0.411      | 0.424              | 0.422                | 0.424       | 0.425          | 0.426        |
| NANOG | IPSC      | 0.311        | 0.0226      | 0.181           | 0.319                   | 0.0304    | 0.291      | 0.306              | 0.306                | 0.313       | 0.312          | 0.317        |
| REST  | liver     | 0.251        | 0.1033      | 0.180           | 0.250                   | 0.1315    | 0.178      | 0.220              | 0.230                | 0.248       | 0.254          | 0.250        |
| TAF1  | liver     | 0.383        | 0.1133      | 0.360           | 0.366                   | 0.1720    | 0.375      | 0.382              | 0.384                | 0.378       | 0.382          | 0.381        |

**Table S5:** Experiment IDs, tissue/cell type information, and biosample “Term ID” of the ENCODE DNase-seq data used in this study. The list of experiments was obtained from [https://www.encodeproject.org/report.tsv?type=Experiment&assay\\_title=DNase-seq&status=released&assembly=hg19&files.file\\_type=fastq&audit.NOT\\_COMPLIANT.category](https://www.encodeproject.org/report.tsv?type=Experiment&assay_title=DNase-seq&status=released&assembly=hg19&files.file_type=fastq&audit.NOT_COMPLIANT.category). (accessed March 2, 2017)

| Experiment ID | Donor ID    | Tissue/Cell Type                                  | Term ID        |
|---------------|-------------|---------------------------------------------------|----------------|
| ENCSR000ENA   | ENCDO223AAA | astrocyte of the hippocampus                      | CL:0002604     |
| ENCSR000ENB   | ENCDO224AAA | astrocyte of the spinal cord                      | CL:0002606     |
| ENCSR000ENH   | ENCDO095AAA | cardiac fibroblast                                | CL:0002548     |
| ENCSR000ENJ   | ENCDO330AAA | cardiac muscle cell                               | CL:0000746     |
| ENCSR000ENN   | ENCDO104AAA | epithelial cell of esophagus                      | CL:0002252     |
| ENCSR000ENQ   | ENCDO232AAA | foreskin fibroblast                               | CL:1001608     |
| ENCSR000ENT   | ENCDO100AAA | iris pigment epithelial                           | CL:0002565     |
| ENCSR000EOE   | ENCDO238AAA | lung microvascular endothelial                    | CL:2000016     |
| ENCSR000ENZ   | ENCDO241AAA | dermis blood vessel endothelial                   | CL:2000010     |
| ENCSR000EOB   | ENCDO243AAA | dermis microvascular lymphatic vessel endothelial | CL:2000041     |
| ENCSR000EOQ   | ENCDO000AAS | endothelial of umbilical vein                     | CL:0002618     |
| ENCSR000EOR   | ENCDO253AAA | fibroblast of villous mesenchyme                  | CL:0002558     |
| ENCSR000EPP   | ENCDO191CQJ | foreskin fibroblast                               | CL:1001608     |
| ENCSR000EPR   | ENCDO269AAA | fibroblast of lung                                | CL:0002553     |
| ENCSR000EQC   | ENCDO334AAA | T-helper 1 primary cell                           | CL:0000545     |
| ENCSR000EMB   | ENCDO442SWC | fibroblast of skin abdomen male adult (22 years)  | CL:2000013     |
| ENCSR000EMJ   | ENCDO114AAA | B primary cell female adult (43 years)            | CL:0000236     |
| ENCSR621ENC   | ENCDO539WIJ | retina tissue fetal (74 days)                     | UBERON:0000966 |
| ENCSR474GZQ   | ENCDO225GSN | retina tissue fetal (125 days)                    | UBERON:0000966 |
| ENCSR503HIB   | ENCDO240JUB | cerebellar cortex tissue male adult (84 years)    | UBERON:0002129 |
| ENCSR627NIF   | ENCDO652XOU | lung tissue male fetal (58 days)                  | UBERON:0002048 |
| ENCSR657DFR   | ENCDO271OUW | thyroid gland tissue female adult (51 year)       | UBERON:0002046 |

**Table S6:** ChIP-seq data sets available for the primary cell types and tissues. The last seven ChIP-seq data sets provide only “relaxed” peak lists.

| TF   | Experiment ID | File ID    | Donor ID    | Tissue/Cell Type                   | Type         |
|------|---------------|------------|-------------|------------------------------------|--------------|
| CTCF | ENCSR000DSU   | ENCF312HCK | ENCDO224AAA | astrocyte of the spinal cord       | relaxed      |
| CTCF | ENCSR000DSU   | ENCF787GLH | ENCDO224AAA | astrocyte of the spinal cord       | conservative |
| CTCF | ENCSR000DTI   | ENCF266GGD | ENCDO330AAA | cardiac muscle cell                | relaxed      |
| CTCF | ENCSR000DTI   | ENCF386NQE | ENCDO330AAA | cardiac muscle cell                | conservative |
| CTCF | ENCSR000DTR   | ENCF528VFN | ENCDO104AAA | epithelial cell of esophagus       | relaxed      |
| CTCF | ENCSR000DTR   | ENCF373BXG | ENCDO104AAA | epithelial cell of esophagus       | conservative |
| CTCF | ENCSR000DPM   | ENCF681OWQ | ENCDO001AAA | fibroblast of lung                 | relaxed      |
| CTCF | ENCSR000DPM   | ENCF138PXI | ENCDO001AAA | fibroblast of lung                 | conservative |
| CTCF | ENCSR000DVQ   | ENCF738CXX | ENCDO253AAA | fibroblast of villous mesenchyme   | relaxed      |
| CTCF | ENCSR000DVQ   | ENCF199ZDU | ENCDO253AAA | fibroblast of villous mesenchyme   | conservative |
| CTCF | ENCSR000DWQ   | ENCF337WIE | ENCDO191CQJ | foreskin fibroblast                | relaxed      |
| CTCF | ENCSR000DWQ   | ENCF275AVH | ENCDO191CQJ | foreskin fibroblast                | conservative |
| CTCF | ENCSR000DLW   | ENCF002DBA | ENCDO000AAS | endothelial cell of umbilical vein | relaxed      |
| CTCF | ENCSR000DWY   | ENCF002DDO | ENCDO269AAA | fibroblast of lung                 | relaxed      |
| CTCF | ENCSR000DUH   | ENCF002DCY | ENCDO232AAA | foreskin fibroblast                | relaxed      |
| CTCF | ENCSR000DQI   | ENCF649IRT | ENCDO000AAG | foreskin fibroblast                | relaxed      |
| JUN  | ENCSR000EFA   | ENCF002CVC | ENCDO000AAS | endothelial cell of umbilical vein | relaxed      |
| MAX  | ENCSR000EEZ   | ENCF002CVE | ENCDO000AAS | endothelial cell of umbilical vein | relaxed      |
| MYC  | ENCSR000DLU   | ENCF002DAZ | ENCDO000AAS | endothelial cell of umbilical vein | relaxed      |

**Table S7:** Prediction performance on primary cell types and tissues using labels derived from ChIP-seq data. Here, we include all performance measures considered in the ENCODE-DREAM challenge.  
 \*: labels determined from only relaxed peaks.

| TF    | DNase ID    | Experiment ID | Matching donor | AUC-ROC | AUC-PR | recall @ 10% FDR | recall @ 50% FDR |
|-------|-------------|---------------|----------------|---------|--------|------------------|------------------|
| CTCF  | ENCSR000ENB | ENCSR000DSU   | yes            | 0.9953  | 0.7895 | 0.5603           | 0.8240           |
| CTCF  | ENCSR000ENJ | ENCSR000DTI   | yes            | 0.9950  | 0.8197 | 0.6316           | 0.8486           |
| CTCF  | ENCSR000ENN | ENCSR000DTR   | yes            | 0.9932  | 0.7788 | 0.5621           | 0.8098           |
| CTCF  | ENCSR000EPP | ENCSR000DWQ   | yes            | 0.9939  | 0.7720 | 0.5517           | 0.7975           |
| CTCF  | ENCSR000EOR | ENCSR000DVQ   | yes            | 0.9939  | 0.8048 | 0.6094           | 0.8319           |
| CTCF  | ENCSR000EPR | ENCSR000DPM   | no             | 0.9913  | 0.7322 | 0.4834           | 0.7600           |
| CTCF* | ENCSR000EOQ | ENCSR000DLW   | yes            | 0.9962  | 0.7270 | 0.4030           | 0.7868           |
| JUN*  | ENCSR000EOQ | ENCSR000EFA   | yes            | 0.9965  | 0.631  | 0.1644           | 0.6996           |
| MAX*  | ENCSR000EOQ | ENCSR000EEZ   | yes            | 0.9967  | 0.4004 | 0.0255           | 0.3327           |
| MYC*  | ENCSR000EOQ | ENCSR000DLU   | yes            | 0.9977  | 0.1989 | 0.000            | 0.0336           |

**Table S8:** ChIP-seq replicate peak files and corresponding IDR-filtered peak files for CTCF and different cell types. Experiment IDs match a subset of those listed in Table S6.

| Replicate peaks         | IDR peaks   | Experiment ID | Biosamples              | Donor       |
|-------------------------|-------------|---------------|-------------------------|-------------|
| ENCFF729AWY,ENCFF892VYV | ENCFF312HCK | ENC SR000DSU  | ENCBS302AAA,ENCBS995OME | ENCDO224AAA |
| ENCFF574BPV,ENCFF883SBZ | ENCFF266GGD | ENC SR000DTI  | ENCBS887NMD,ENCBS465QGC | ENCDO330AAA |
| ENCFF015JHG,ENCFF114UPJ | ENCFF528VFN | ENC SR000DTR  | ENCBS044KJV,ENCBS191CHS | ENCDO104AAA |
| ENCFF290QTC,ENCFF683BND | ENCFF337WIE | ENC SR000DWQ  | ENCBS748WVA,ENCBS271PJP | ENCDO191CQJ |
| ENCFF493VQC,ENCFF777VSN | ENCFF649IRT | ENC SR000DQJ  | ENCBS488ZLU,ENCBS693PNC | ENCDO000AAG |

**Table S9:** Jaccard coefficients between predicted (columns) and experimentally determined (rows) peak files for CTCF. Entries of matching tissues/cell types are marked in bold. In each row, we mark the largest value in green for matching cell types and in red for differing cell types. We mark matching donor with “(y)”. Jaccard coefficients are computed using the `intersect` and `union` of the `GenomicRanges` R package. For each peak list, entries are sorted by score and limited to the minimum number of peaks across all peak lists. We find that many of the cell type-specific predictions for CTCF are more similar to the ChIP-seq peaks determined for “endothelial cells of umbilical vein” than to those of their cell type of origin according to the DNase-seq data. One reason might be that only for this experiment (ENCSTR000DLW), peaks have not been called using the uniform ENCODE pipeline including SPP [17], but by another, “unknown” software. However, if we in turn ask for each experimentally determined peak list, which of the predicted peak lists is the most similar one, this picture becomes more encouraging. For 7 of the 8 cell types with matching donor between ChIP-seq and DNase-seq data, the most similar prediction is obtained for the true cell type, while in one case (“fibroblast of lung”), the most similar cell type is “foreskin fibroblast”.

|                                                   |                                             |                                    |                                                   |                                             |                                   |                                                 |                                    |                                    |
|---------------------------------------------------|---------------------------------------------|------------------------------------|---------------------------------------------------|---------------------------------------------|-----------------------------------|-------------------------------------------------|------------------------------------|------------------------------------|
|                                                   | astrocyte of the spinal cord (ENCSTR000ENB) | cardiac muscle cell (ENCSTR000ENJ) | endothelial cell of umbilical vein (ENCSTR000EOQ) | epithelial cell of esophagus (ENCSTR000ENN) | fibroblast of lung (ENCSTR000EPR) | fibroblast of villous mesenchyme (ENCSTR000EOR) | foreskin fibroblast (ENCSTR000ENQ) | foreskin fibroblast (ENCSTR000EPP) |
| astrocyte of the spinal cord (ENCSTR000DSU)       | <b>0.5852</b> (y)                           | 0.5732                             | 0.5465                                            | 0.5555                                      | 0.5675                            | 0.5659                                          | 0.5725                             | 0.5537                             |
| cardiac muscle cell (ENCSTR000DTI)                | 0.5503                                      | <b>0.5754</b> (y)                  | 0.5309                                            | 0.5287                                      | 0.5408                            | 0.5540                                          | 0.5517                             | 0.5395                             |
| endothelial cell of umbilical vein (ENCSTR000DLW) | 0.6995                                      | 0.7049                             | <b>0.7090</b> (y)                                 | 0.6849                                      | 0.6730                            | 0.6924                                          | 0.6888                             | 0.6664                             |
| epithelial cell of esophagus (ENCSTR000DTR)       | 0.5228                                      | 0.5230                             | 0.4998                                            | <b>0.5576</b> (y)                           | 0.5123                            | 0.5147                                          | 0.5214                             | 0.5014                             |
| fibroblast of lung (ENCSTR000DPM)                 | 0.5361                                      | 0.5372                             | 0.5119                                            | 0.5094                                      | <b>0.5257</b> (y)                 | 0.5338                                          | <b>0.5383</b>                      | 0.5290                             |
| fibroblast of lung (ENCSTR000DWY)                 | 0.6451                                      | 0.6478                             | 0.6197                                            | 0.6204                                      | <b>0.6391</b> (y)                 | 0.6497                                          | <b>0.6530</b>                      | 0.6501                             |
| fibroblast of villous mesenchyme (ENCSTR000DVQ)   | 0.5818                                      | 0.5977                             | 0.5629                                            | 0.5663                                      | 0.5737                            | <b>0.6084</b> (y)                               | 0.5938                             | 0.5758                             |
| foreskin fibroblast (ENCSTR000DQI)                | 0.5752                                      | 0.5787                             | 0.5558                                            | 0.5549                                      | 0.5723                            | 0.5837                                          | <b>0.5920</b>                      | <b>0.5850</b>                      |
| foreskin fibroblast (ENCSTR000DUH)                | 0.6714                                      | 0.6755                             | 0.6447                                            | 0.6509                                      | 0.6637                            | 0.6787                                          | <b>0.6934</b> (y)                  | <b>0.6770</b>                      |
| foreskin fibroblast (ENCSTR000DWQ)                | 0.5400                                      | 0.5402                             | 0.5141                                            | 0.5086                                      | 0.5301                            | 0.5418                                          | <b>0.5469</b>                      | <b>0.5680</b> (y)                  |





**Table S11:** Jaccard coefficient between experimentally determined and predicted peak files. Jaccard coefficients are computed using the `intersect` and `union` of the `GenomicRanges` R package. For each TF, entries of the experimentally determined and predicted peak lists are sorted by score and limited to the minimum number of peaks in either of the two peak lists.

| TF  | ChIP-seq                                          | Predicted                                         | Matching donor | Jaccard coefficient |
|-----|---------------------------------------------------|---------------------------------------------------|----------------|---------------------|
| JUN | endothelial cell of umbilical vein (ENCSTR000EFA) | endothelial cell of umbilical vein (ENCSTR000EOQ) | yes            | 0.4500              |
| MAX | endothelial cell of umbilical vein (ENCSTR000EEZ) | endothelial cell of umbilical vein (ENCSTR000EOQ) | yes            | 0.3634              |
| MYC | endothelial cell of umbilical vein (ENCSTR000DLU) | endothelial cell of umbilical vein (ENCSTR000EOQ) | yes            | 0.2221              |

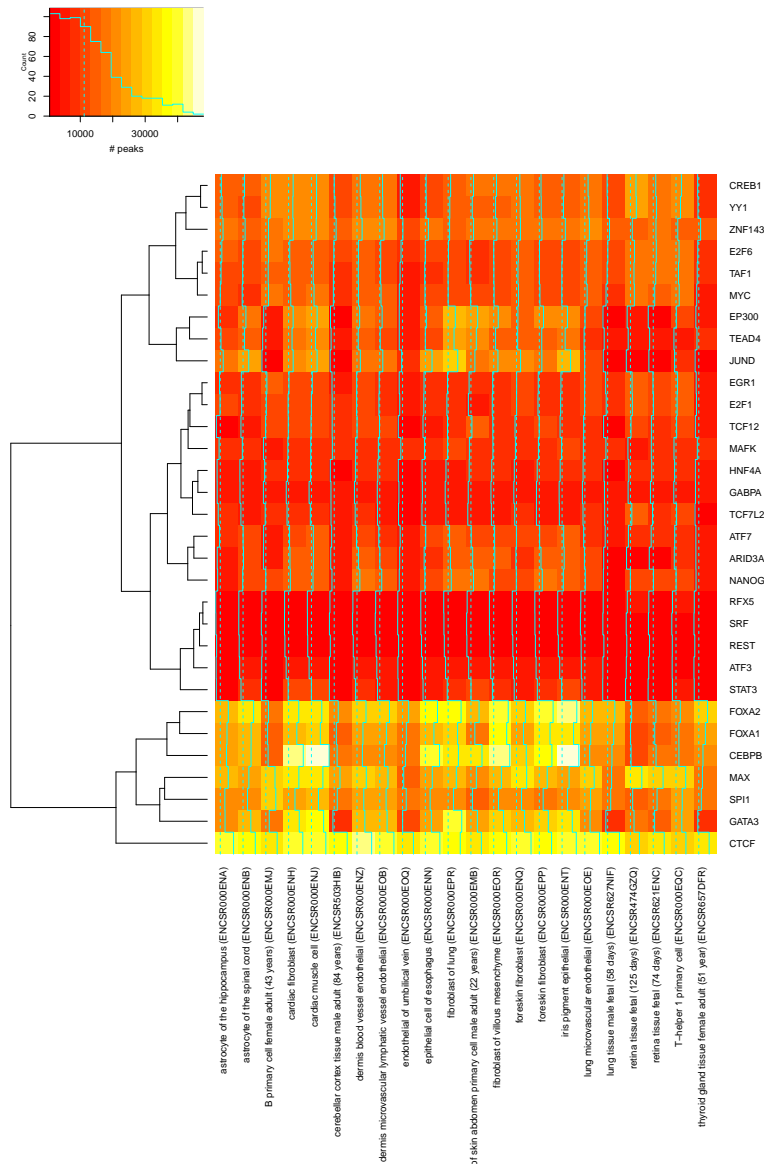

**Fig. S7:** Number of predicted peaks in “conservative” peak files for the studied TFs (rows) in the collection of primary cell types and tissues (columns). In each column of the heatmap, cyan trace lines in addition to colors indicate the corresponding values in each cell. In the color scale, the solid cyan line represents the histogram of values observed in the heatmap. Dashed lines indicate median values across all displayed numbers. Rows are clustered by the R `hclust` function using complete linkage.

**Table S12:** Jaccard coefficient between IDR-thresholded peaks and predicted peaks (cf. Table S9), between IDR-thresholded peaks and peaks called from the individual technical replicates, and between technical replicates.

| Experiment ID | DNase prediction | IDR vs. Predictions | IDR vs. Rep1 | IDR vs. Rep2 | Rep1 vs. Rep2 |
|---------------|------------------|---------------------|--------------|--------------|---------------|
| ENCSR000DSU   | ENCSR000ENB      | 0.5852              | 0.7440       | 0.7331       | 0.8444        |
| ENCSR000DTI   | ENCSR000ENJ      | 0.5754              | 0.7049       | 0.7239       | 0.8763        |
| ENCSR000DTR   | ENCSR000ENN      | 0.5576              | 0.7317       | 0.6965       | 0.8024        |
| ENCSR000DWQ   | ENCSR000ENQ      | 0.5469              | 0.7604       | 0.7539       | 0.8614        |
| ENCSR000DWQ   | ENCSR000EPP      | 0.5680              | 0.7604       | 0.7539       | 0.8614        |
| ENCSR000DQI   | ENCSR000ENQ      | 0.5920              | 0.8060       | 0.7908       | 0.8641        |
| ENCSR000DQI   | ENCSR000EPP      | 0.5850              | 0.8060       | 0.7908       | 0.8641        |

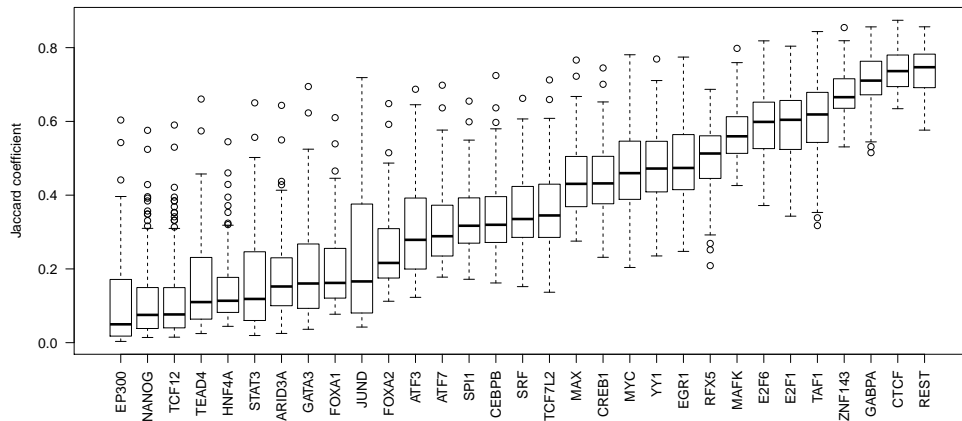

**Fig. S8:** Jaccard coefficients of the different TFs computed on the overlap of the peak files between all pairs of the 22 individual cell types.

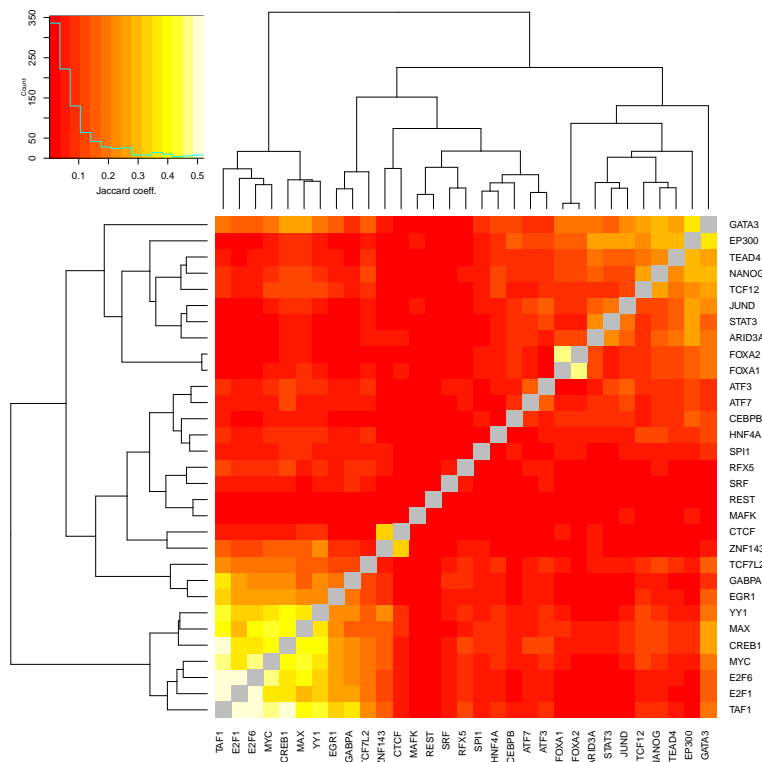

**Fig. S9:** Average Jaccard coefficients computed on the overlap of the peak files of pairs of TFs for matched cell types. In the color scale, the solid cyan line represents the histogram of values observed in the heatmap. Dashed lines indicate the value at the center bin of the color scale. Rows and columns are clustered by the R `hclust` function using complete linkage.

| TF    | cell type | DNase+motif |      |         | Catchitt |      |         |                 |
|-------|-----------|-------------|------|---------|----------|------|---------|-----------------|
|       |           | AUC-PR      | Rank | #motifs | AUC-PR   | Rank | #motifs | first iteration |
| CTCF  | IPSC      | 0.810       | 4    | 177     | 0.776    | 6    | 13      | 0.760           |
| NANOG | IPSC      | 0.489       | 2    | 127     | 0.404    | 4    | 13      | 0.366           |
| FOXA1 | liver     | 0.544       | 2    | 121     | 0.465    | 4    | 12      | 0.435           |
| HNF4A | liver     | 0.671       | 4    | 123     | 0.615    | 6    | 10      | 0.597           |
| TAF1  | liver     | 0.473       | 4    | 160     | 0.412    | 6    | 12      | 0.400           |

**Table S13:** Benchmark of the simplified open source implementation (Catchitt) of the presented approach compared with the challenge implementation using only DNase-based and motif-based features for the within cell type case (cf. Fig. S3). For each of the TFs considered, we report AUC-PR achieved by the challenge implementation using only DNase-based and motif-based features (“DNase+motif”), the open source Catchitt implementation. For Catchitt, we additionally consider using only the classifier of the first iteration (in analogy to the comparison in Fig. S4). We also list the number of motifs utilized in the respective runs for a specific TFs. For the Catchitt runs, we deliberately limited the number of motifs considered to approximate a real-world application of the software. We finally report the ranks among the challenge participants according to the results available at <https://www.synapse.org/#!Synapse:syn6131484/wiki/412905>.

| TF     | Initial extraction | Training | Iter. extraction | Iter. prediction | Total | Catchitt |
|--------|--------------------|----------|------------------|------------------|-------|----------|
| ARID3A | 115                | 538      | 86               | 477              | 1216  |          |
| ATF2   | 118                | 640      | 89               | 612              | 1458  |          |
| ATF3   | 153                | 1338     | 113              | 648              | 2252  |          |
| ATF7   | 133                | 1573     | 97               | 665              | 2467  |          |
| CEBPB  | 163                | 3200     | 116              | 582              | 4062  |          |
| CREB1  | 132                | 1027     | 100              | 581              | 1840  |          |
| CTCF   | 157                | 2576     | 114              | 567              | 3414  | 1874     |
| E2F1   | 108                | 356      | 80               | 503              | 1046  |          |
| E2F6   | 126                | 731      | 99               | 579              | 1536  |          |
| EGR1   | 125                | 705      | 95               | 530              | 1454  |          |
| EP300  | 156                | 1593     | 115              | 672              | 2536  |          |
| FOXA1  | 110                | 1078     | 83               | 400              | 1671  | 397      |
| FOXA2  | 109                | 1851     | 78               | 442              | 2480  |          |
| GABPA  | 130                | 552      | 103              | 592              | 1377  |          |
| GATA3  | 106                | 597      | 82               | 457              | 1242  |          |
| HNF4A  | 103                | 553      | 82               | 401              | 1139  | 910      |
| JUND   | 150                | 2153     | 112              | 652              | 3068  |          |
| MAFK   | 143                | 1408     | 110              | 552              | 2213  |          |
| MAX    | 160                | 2130     | 117              | 718              | 3124  |          |
| MYC    | 142                | 1016     | 109              | 581              | 1848  |          |
| NANOG  | 99                 | 203      | 79               | 408              | 789   | 405      |
| REST   | 152                | 1150     | 117              | 586              | 2006  |          |
| RFX5   | 136                | 854      | 107              | 610              | 1707  |          |
| SPI1   | 110                | 1000     | 83               | 400              | 1593  |          |
| SRF    | 151                | 993      | 117              | 647              | 1908  |          |
| STAT3  | 114                | 532      | 86               | 481              | 1213  |          |
| TAF1   | 140                | 948      | 108              | 624              | 1819  | 348      |
| TCF12  | 119                | 771      | 92               | 523              | 1505  |          |
| TCF7L2 | 137                | 889      | 102              | 722              | 1850  |          |
| TEAD4  | 159                | 1650     | 115              | 716              | 2639  |          |
| YY1    | 149                | 1298     | 107              | 602              | 2157  |          |
| ZNF143 | 145                | 1685     | 102              | 545              | 2478  |          |

**Table S14:** Runtime (in minutes) of the original challenge implementation using the full set of features. We separately list the average runtime per TF for i) the initial extraction of features values, ii) the training of parameters given the training data, summed over all iterations, iii) the extraction of further examples in the iterations, and iv) the prediction in the iterations. Finally, we list the total runtime of the complete iterative training, i.e., the sum over the previous columns. For comparison, we further list the total runtimes of the Catchitt runs (cf. Table S13) for five TFs. In addition to the iterative training, further runtime is required for generating features files from raw files. The extraction of features from DNase-seq data (bigwig format) takes approximately 30 min in both implementations. The implementation for scanning genomes with PWMs is slightly more efficient in Catchitt (20 min) compared with the original challenge implementation (30 min), which computes some additional features. Runtime improvement is especially pronounced for genome-wide scans using complex Slim models: while a genome-wide scan using a full Slim model of length 20 for CTCF takes approx. 1700 min in the original challenge implementation, the more efficient Catchitt implementation only needs 240 min. Runtimes measured on an Intel Xeon E5-2680v3 using 8 cores for parallel jobs.

## Supplementary Methods

### Text S1 – Tools for predicting in-vivo binding regions

Most approaches (e.g., [1, 2, 5, 7, 16]) use binding motifs represented as position weight matrix (PWM) models that have been obtained from databases like TRANSFAC [18], Jaspar [19], UniProbe [20] or CisBP [21], or from motif collections like Factorbook [22], the ENCODE-motif collection [23], or Homer [24], while some perform de-novo motif discovery based on k-mers [3] or as part of convolutional neural networks [12, 14]. Irrespective of the source of the motifs considered, three general schemas have been established for combining motif predictions with chromatin accessibility data. First, motif matches (i.e., predicted binding sites) may be used as prior information and combined with DNase-seq data to distinguish functional from non-functional binding sites (e.g., [1, 11, 8]), Second, TF footprints may be first identified from DNase-seq data and then annotated with specific TFs based on motif matches afterwards [7]. Third, both sources of information are combined in a holistic approach [12, 14]. DNase-seq (and ATAC-seq) data are employed in different ways by existing approaches including i) binning of chromatin accessibility statistics in larger genomic regions around putative binding sites [4], ii) association of chromatin accessibility with specific genes [15], or iii) high-resolution maps of DNase cut sites [6, 8], which may additionally be considered separately for each DNA strand [5]. On the methodological level, approaches either follow a supervised approach based on training examples labeled as “bound” or “unbound”, typically derived from TF ChIP-seq data (e.g., [3, 4, 9, 13]), or an unsupervised approach clustering regions into “bound” and “unbound” based on their experimental properties (e.g., DNase-seq data or histone modifications [1, 6, 7]), while others base their predictions on statistical tests [5] or scores related to binding affinity predictions [15]. Supervised approaches use a variety of methods like support vector machines [3, 10], (sparse) logistic regression [2, 4, 9, 16], random forests [13], or neural networks adapted by deep learning [12, 14]. Unsupervised approaches use hierarchical mixture models [1], hierarchical multi-scale models [8], hidden Markov models [7], or other probabilistic models [6]. In some approaches, sequence-based features besides motif matches [10, 7, 16], sequence conservation [10, 13, 16], or additional experimental data like histone modification [1, 3, 7] are included into the model. Finally, a subset of approaches uses the prediction of TF binding regions as an intermediate step for predicting gene regulation [2] or tissue-specific gene expression [15].

### Text S2 – Features

The features described in the following are all determined on the level of genome bins. We refer to the bin for which the a-posteriori probability of being peak center should be computed (i.e., the bin containing the peak summit in case of positive examples) as *center bin*. Further, adjacent bins considered are defined relative to that center bin (see also main text, section *Prediction schema*).

## S2.1 Sequence-based features

As a first sequence-based feature, we consider the raw DNA sequence according to the *hg19* human genome sequence in the center bin and the directly preceding and the directly following bin. In total, this corresponds to 150 bp of sequence, centered at the center bin.

We further consider the mean G/C-content, and the relative frequency of CG di-nucleotides in the raw sequence spanning those three bins centered at the center bin. G/C-content might be an informative property of promoters bound by a certain TF, and an enrichment of CG di-nucleotides might be informative about the presence of CpG islands.

We also compute the Kullback-Leibler divergence between the relative frequencies of all tri-nucleotides in each of these three bins compared with their relative frequencies in the complete genome. As a feature, we then consider the maximum of those three Kullback-Leibler divergence values obtained for the three bins. Here, the reasoning is that a deviation from the genomic distribution of tri-nucleotides might be a sign of the general information content of a sequence, which might help to distinguish coding and non-coding DNA regions as well as identifying regions that encode regulatory information.

Finally, we consider the length of the longest poly-A or poly-T tract, the length of the longest poly-C or poly-G tract, the length of the longest poly-A/T tract, and the length of the longest poly-G/C tract in these three bins.

All of those sequence-based features are neither TF-specific nor cell type-specific, but model parameters learned on their feature values might well be different for different training TFs or cell types.

## S2.2 Annotation-based features

Based on the Gencode v19 genome annotation of the *hg19* genome, we derive a set of annotation-based features. First, we consider the distance of the current center bin to the closest TSS annotation (regardless of its strand orientation), which might be informative about core promoter regions. Second, we collect the binary information if the current center bin overlaps with annotations of i) a CDS, ii) a UTR, iii) an exon, iv) a transcript, or v) a TSS annotation, separately for each of the two possible strand orientations. Like some of the previous features, this helps to identify coding, non-coding but transcribed, core promoter, and intergenic regions. Again, these features are not TF or cell type-specific, but model parameters may be adapted specifically for a TF or cell type.

## S2.3 Motif-based features

As it might be expected that binding motifs are pivotal for predicting TF-specific binding regions, we create a large collection of motifs for each of the TFs considered. For each of the TFs, we collect all position weight matrix models from the HOCOMOCO database [25] as well as our in-house database DBcorrDB [26], and Slim/LSlim models of the respective TFs from a previous publication [27]. In addition, we learn a large set of motifs from the data provided in the challenge using our motif discovery tools



Dimont [28] using PWM as well as LSlim(3) models [27]. Specifically, we perform motif discovery for

- PWM models from the “conservative” peak files for each training cell type,
- PWM models from the “relaxed” peak files complemented by negative regions selected to be DNase positive (i.e., open chromatin) but ChIP-seq negative according to the ChIP-seq and DNase-seq peak files provided with the challenge data,
- LSlim(3) models from the “conservative” peak files for each training cell type,
- LSlim(3) models from the “relaxed” peak files for each training cell type,
- LSlim(3) models from the “relaxed” peak files complemented by negative regions selected to be DNase positive (i.e., open chromatin) but ChIP-seq negative according to the ChIP-seq and DNase-seq peak files provided with the challenge data.

LSlim(3) may capture intra-motif dependencies between binding site position with a distance of at most three nucleotides.

Motifs discovered using models of different complexity on these different sets of training data (“conservative” and “relaxed” peaks, and “relaxed” peaks complemented by DNase positive regions) should i) capture the breadth of the binding landscape of a TF as represented by the different levels of stringency (“conservative” vs. “relaxed”), and ii) represent potential intra-motif dependencies as well as traditional, “additive” binding affinities. In addition, we learn motifs from the DNase-seq peak files as well, considering

- LSlim(3) models from the “conservative” and “relaxed” DNase-seq peak files,
- LSlim(3) models from the regions in the intersection of all “relaxed” DNase-seq peak files.

Learning motifs from the DNase-seq data alone might have the potential to capture additional binding motifs of TFs that are important for cell type-specific predictions but are not represented in the ChIP-seq data provided with the challenge data.

Regardless of the TF considered, we further include PWM and Slim/LSlim motifs discovered previously [27, 26] for CTCF, SP1, JUN, and MAX, as those i) mark boundaries between regulatory regions, ii) frequently interact with other transcription factors, or iii) bind to a large fraction of active promoters. Further TFs that might interact with the currently considered TF as determined i) from the literature, specifically from Factorbook [22], ii) determined from the overlap between the ChIP-seq peaks provided with the challenge data. The latter is accomplished by computing for each TF and cell type i) the TF with the largest overlap (F1 measure computed on the peaks) and ii) the TF with the lowest overlap between the peak files. The former might be indicative of co-binding, while the latter might indicate mutually exclusive binding, both of which might help to predict TF-specific binding regions.

Finally, we consider motifs determined by the epigram pipeline [29], which mark epigenetic modifications. Specifically, we select the top 10 motifs reported for “single mark” analyses for methylation, and H3K4me3 and H3K27ac histone modifications (downloaded from <http://wanglab.ucsd.edu/star/epigram/mods/index.html>).

We use all motif models described above to scan the hg19 genome for potential binding regions. To this end, we apply a sliding window approach across the genome, and aggregate the motif scores obtained according to the genomic bins. For the TF-specific motifs obtained by de-novo motif discovery from ChIP-seq data, we consider as features

- the maximum log-probability of all sliding windows starting in the center bin,
- the logarithm of the sum of binding probabilities in all sliding windows starting in the center bin or its two adjacent bins, and
- the logarithm of the sum of binding probabilities in all sliding windows starting in any of the bins considered.

The first feature should capture the binding affinity at the strongest binding site around the peak summit, while the latter two features represent the general binding affinity of a region with different levels of resolution.

For all of the remaining motifs, we consider the maximum of the bin-wise logarithm of the sum of binding probabilities over all bins considered (see main text, section *Binning the genome*), as this reduces memory requirements as well as model complexity and this level of detail might be sufficient to capture TF interactions.

## S2.4 DNase-based features

For the DNase-seq data, the challenge provided tracks with a “fold-enrichment coverage” track, peak files, and the original BAM files from mapping the DNase-seq reads, of which we consider only the former two. From the fold-enrichment coverage track, we compute the following statistics:

- the minimum value across the center bin and its two adjacent bins,
- the minimum of the maximum value within each bin considered,
- the minimum of the 25% percentile within each bin considered, and
- the median values of all the bins considered.

After extracting those feature values for all genomic bins, we quantile normalize each of the features independently across the challenge cell types. Before normalization, we randomize the order of values to avoid systematic effects due to genomic order, which might especially occur for the large number of very low values. For the additional, primary cell types, we do not perform an independent quantile normalization but instead map the DNase-seq features (according to their numerical order) to the corresponding, quantile normalized values of the challenge cell types.

In addition to these short-range DNase features, we also determine a set of long-range features, which are computed from i) 10 bins ii) 20 bins, and iii) 40 bins preceding and succeeding the current center bin. These features are

- the minimum value across all bins,
- the maximum value across all bins,

- the minimum value across the bins preceding the center bin,
- the minimum value across the bins succeeding the center bin,
- the maximum value across the bins preceding the center bin, and
- the maximum value across the bins succeeding the center bin.

Together, these features capture chromatin accessibility on a short and long range level with reasonable resolution, which should be highly informative with regard to the general TF-binding potential. Model parameters should then be able to adapt for TF-specific preferences of chromatin accessibility.

For the current center bin, we additionally determine features of stability across the different cell types, namely

- the ratio of the minimum value in the current cell type divided by the average of the minimum values across all cell types,
- the ratio of the maximum value in the current cell type divided by the average of the maximum values across all cell types,
- the coefficient of variation (standard deviation divided by mean) of the minimum values across all cell types, and
- the coefficient of variation of the maximum values across all cell types,

where the latter two features are identical for all cell types by design.

We also determine several features that represent the monotonicity/stability of these DNase-seq signals. Specifically, these features are

- the number of steps (increasing or decreasing) in the track profile in a 450 bp interval centered at the center bin,
- the longest strictly monotonically increasing stretch in the four bins preceding the center bin,
- the longest strictly monotonically decreasing stretch in the four bins preceding the center bin,
- the longest strictly monotonically increasing stretch in the four bins succeeding the center bin, and
- the longest strictly monotonically decreasing stretch in the four bins succeeding the center bin.

The first of these features has been inspired by the “orange” feature coined by team *autosome.ru* in the challenge.

Finally, we define further features based on the “conservative” and “relaxed” DNase-seq peak files as provided with the challenge data. These are

- the distance of the center bin to the summit of the closest conservative peak,

- the distance of the center bin to the summit of the closest relaxed peak,
- the peak statistic of a conservative peak overlapping the center bin (or zero if no such overlapping peak exists) multiplied by the length of the overlap,
- the peak statistic of a relaxed peak overlapping the center bin (or zero if no such overlapping peak exists) multiplied by the length of the overlap,
- the maximum of the q-values of an overlapping conservative peak (or zero if no such overlapping peak exists) multiplied by the length of the overlap across the five central bins,
- the maximum of the q-values of an overlapping relaxed peak (or zero if no such overlapping peak exists) multiplied by the length of the overlap across the five central bins.

### S2.5 RNA-seq-based features

The RNA-seq data provided with the challenge data included the TPM values of genes according to the gencode v19 genome annotation. TPM values are also quantile normalized across the cell types. As features, we consider

- the maximum TPM value (averaged over the two bio-replicates per cell type) of genes in at most 2.5 kb distance
- the coefficient of variation of the bio-replicated of the corresponding gene,
- the relative difference (difference of values in bio-replicated divided by their mean value) of the corresponding gene.

In analogy to the DNase-based features, we computed from the first feature as measures of stability across the different cell types

- the ratio of the maximum TPM value in the current cell type divided by the average of the maximum values across all cell types, and
- the coefficient of variation of the maximum TPM values across all cell types.

### Text S3 – Model & learning principle

For numerical features  $x$ , we use independent Gaussian densities parameterized as

$$\mathcal{N}(x|\lambda, \mu) := \sqrt{\frac{e^\lambda}{2\pi}} \cdot e^{-\frac{e^\lambda}{2}(x-\mu)^2},$$

which allows for unconstrained numerical optimization of both,  $\lambda$  and  $\mu$ .

For features  $y$  with  $K$  possible discrete values  $v_1, \dots, v_K$ , we use (unnormalized) multinomial distributions with parameters  $\boldsymbol{\beta} = (\beta_1, \dots, \beta_K)$  defined as

$$\mathcal{B}(y|\boldsymbol{\beta}) := \prod_{k=1}^K \left( \frac{\exp(\beta_k)}{\sum_{\ell} \exp(\beta_{\ell})} \right)^{\delta(y=v_k)}.$$

The multinomial coefficient is neglected in this case, since it only depends on the input data but not on the model parameters. In case of binary features, i.e.,  $K=2$ , this corresponds to an (unnormalized) binomial distribution.

For modeling the raw sequence  $\mathbf{s} = s_1 s_2 \dots s_L$ ,  $s_\ell \in \Sigma = \{A, C, G, T\}$ , we use a homogeneous Markov model of order 3 parameterized as

$$\mathcal{M}(\mathbf{s}|\boldsymbol{\beta}_s) := \frac{\exp(\beta_{1,s_1})}{\sum_{a \in \Sigma} \exp(\beta_{1,a})} \cdot \frac{\exp(\beta_{2,s_2|s_1})}{\sum_{a \in \Sigma} \exp(\beta_{2,a|s_1})} \cdot \frac{\exp(\beta_{3,s_3|s_1 s_2})}{\sum_{a \in \Sigma} \exp(\beta_{3,a|s_1 s_2})} \cdot \prod_{\ell=4}^L \frac{\exp(\beta_{h,s_\ell|s_{\ell-3}s_{\ell-2}s_{\ell-1}})}{\sum_{a \in \Sigma} \exp(\beta_{h,a|s_{\ell-3}s_{\ell-2}s_{\ell-1}})},$$

where  $\beta_{h,a|\mathbf{b}}$ ,  $a \in \Sigma$ ,  $\mathbf{b} \in \Sigma^3$  are the homogeneous parameters and  $\boldsymbol{\beta}_s = (\beta_{1,A}, \dots, \beta_{1,T}, \beta_{2,A|A}, \dots, \beta_{2,T|T}, \beta_{3,A|AA}, \dots, \beta_{3,T|TT}, \beta_{h,A|AAA}, \dots, \beta_{h,T|TTT})$  denotes the vector of all model parameters.

Let  $\mathbf{x} = (x_1, \dots, x_N)$  denote the vector of all numerical features,  $\mathbf{y} = (y_1, \dots, y_M)$  denote the vector of all discrete features, and  $\mathbf{s}$  denote the raw sequence of one region represented by its feature values  $\mathbf{z} = (\mathbf{x}, \mathbf{y}, \mathbf{s})$ . Let  $\boldsymbol{\theta} = (\lambda_1, \dots, \lambda_N, \mu_1, \dots, \mu_M, \boldsymbol{\beta}_1, \dots, \boldsymbol{\beta}_M, \boldsymbol{\beta}_s)$  denote the set of all model parameters. We compute the likelihood of  $\mathbf{z}$  as an independent product of the terms for the individual features, i.e.,

$$P(\mathbf{z}|\boldsymbol{\theta}) := \left( \prod_{\ell=1}^N \mathcal{N}(x_\ell | \lambda_\ell, \mu_\ell) \right) \cdot \left( \prod_{\ell=1}^M \mathcal{B}(y_\ell | \boldsymbol{\beta}_\ell) \right) \cdot \mathcal{M}(\mathbf{s}|\boldsymbol{\beta}_s).$$

For modeling the distribution in the positive (foreground) and negative (background) class, we use likelihoods  $P(\mathbf{z}|\boldsymbol{\theta}_{fg})$  and  $P(\mathbf{z}|\boldsymbol{\theta}_{bg})$  with independent sets of parameters  $\boldsymbol{\theta}_{fg}$  and  $\boldsymbol{\theta}_{bg}$ , respectively. In addition, we define the a-priori class probabilities as  $P(fg|\gamma_1, \gamma_2) := \frac{\exp(\gamma_1)}{\exp(\gamma_1) + \exp(\gamma_2)}$  and  $P(bg|\gamma_1, \gamma_2) = \frac{\exp(\gamma_2)}{\exp(\gamma_1) + \exp(\gamma_2)}$ .

Based on these definitions, we may compute the a-posteriori class probability of the positive class as

$$P(fg|\mathbf{z}, \boldsymbol{\theta}_{fg}, \boldsymbol{\theta}_{bg}, \gamma) = \frac{P(fg|\gamma_1, \gamma_2) \cdot P(\mathbf{z}|\boldsymbol{\theta}_{fg})}{P(fg|\gamma_1, \gamma_2) \cdot P(\mathbf{z}|\boldsymbol{\theta}_{fg}) + P(bg|\gamma_1, \gamma_2) \cdot P(\mathbf{z}|\boldsymbol{\theta}_{bg})},$$

and the a-posteriori class probability of the negative class in complete analogy.

Using the discriminative maximum conditional likelihood principle [30], the parameters are optimized such that the a-posteriori probabilities of the correct class labels given data and parameters are maximized. Here, we use a variant [31] of the maximum conditional likelihood principle that incorporates weights. Let  $\mathbf{F} = (\mathbf{z}_1, \dots, \mathbf{z}_I)$  denote the set of positive examples and let  $\mathbf{B} = (\mathbf{z}_{I+1}, \dots, \mathbf{z}_J)$  denote the set of negative examples, where  $\mathbf{z}_i$  is assigned weight  $w_i$ . The parameters are then optimized with regard to

$$(\boldsymbol{\theta}_{fg}^*, \boldsymbol{\theta}_{bg}^*, \gamma^*) = \underset{(\boldsymbol{\theta}_{fg}, \boldsymbol{\theta}_{bg}, \gamma)}{\operatorname{argmax}} \left[ \sum_{i=1}^I w_i \cdot \log P(fg|\mathbf{z}_i, \boldsymbol{\theta}_{fg}, \boldsymbol{\theta}_{bg}, \gamma) + \sum_{i=I+1}^J w_i \cdot \log P(bg|\mathbf{z}_i, \boldsymbol{\theta}_{fg}, \boldsymbol{\theta}_{bg}, \gamma) \right].$$

#### **Text S4 – Sampling of DNase-matched negative regions**

We sample negative regions with chromatin accessibility values matched to the positive regions (following an idea related to importance sampling) as explained in the following. We consider the center bins of all positive regions, collect the corresponding DNase-seq median feature values (see Text S2) of those bins, and determine a histogram of the collected values. The histogram is composed of 20 equally sized bins between the observed maximum and minimum values of the DNase-seq median values. This histogram represents an approximation of the distribution of DNase-seq median values in the positive regions. As we expect DNase-seq values to be highly informative about TF binding, we aim at sampling a representative set of negative regions that exhibit similar DNase-seq values but might be distinguished from positive regions by other features.

To this end, we assign each of the negative regions to the same histogram bins based on their respective DNase-seq median values at their center bins. This also yields an analogous histogram of the DNase-seq median values for the negative regions, which will usually be different from the histogram for the positive regions.

Within each histogram bin, we then draw a subset of the negative regions assigned to that bin by i) drawing a subset of these regions four times as large as the corresponding positive set, and ii) weighting the drawn negative regions such that the sum of weights matches the relative abundance of that histogram bin in the histogram on all negative region.

Conceptually, this procedure yields an over-sampling of negative regions with large DNase-seq median features, which is adjusted for by down-weighting such examples to the corresponding frequency on the chromosome level. This is especially important as these will be regions that are hard to classify using DNase-seq based features but are only lowly represented by the uniform sampling schema.

#### **Text S5 – Implementation notes**

The code for model training and prediction of both the challenge implementation and also the Catchitt implementation is based in the Java library `Jstacs` [32] available from github (<https://github.com/Jstacs/Jstacs>). In the following, we list specific classes that have been used in either or both of the implementations. The classes specific to the challenge implementation realizing, for instance, the iterative training procedure can be found in package `projects.dream2016`, while the Catchitt implementation can be found in package `projects.encodedream`.

The product of Gaussian densities used in both versions of the code is implemented in the class `de.jstacs.sequenceScores.statisticalModels.differentiable.continuous.GaussianNetwork`. While this class generally supports Gaussian networks including dependencies between random variables, we handle features independently (as specified by the `structure` parameter) in this case.

For discrete features, which are included only in the challenge implementation, we use the class `de.jstacs.sequenceScores.statisticalModels.differentiable.directedGraphicalModels.BayesianNetworkDiffSM` implementing fixed-structure discrete Bayesian networks including inhomogeneous Markov models, and the class `de.jstacs.sequenceScores.statisticalModels.differentiable.homogeneous.HomogeneousMMDiffSM` for homogeneous Markov models.

Models for the individual labels on the training data (i.e., classes in the sense of classification problems) are wrapped in a generic classifier class `de.jstacs.classifiers.differentiableSequenceScoreBased.gendismix.GenDisMixClassifier` using the discriminative maximum conditional likelihood principle for parameter estimation. As parameter estimation needs to be carried out numerically, this class uses an implementation of a quasi-Newton optimization method, internally, as implemented in `de.jstacs.algorithms.optimization.Optimizer` (method `quasiNewtonBFGS`).

Core classes for the iterative training procedures used in Catchitt and in the challenge implementation are `projects.encodedream.IterativeTraining` and `projects.dream2016.IterativeTraining_Round2`, respectively.

After model (and classifier) parameters have been adapted on the training data, binding probabilities for individual feature vectors from the test data are determined using the `getScores` method of `de.jstacs.classifiers.differentiableSequenceScoreBased.gendismix.GenDisMixClassifier`.

Averaging over classifier predictions is performed in the method `aggregate` of `projects.encodedream.Predictor` and class `projects.dream2016.Aggregation_multi`, respectively.

## References

- [1] Pique-Regi, R., Degner, J.F., Pai, A.A., Gaffney, D.J., Gilad, Y., Pritchard, J.K.: Accurate inference of transcription factor binding from DNA sequence and chromatin accessibility data. *Genome Research* **21**(3), 447–455 (2011)
- [2] Natarajan, A., Yardimci, G.G., Sheffield, N.C., Crawford, G.E., Ohler, U.: Predicting cell-type-specific gene expression from regions of open chromatin. *Genome Research* **22**(9), 1711–1722 (2012)
- [3] Arvey, A., Agius, P., Noble, W.S., Leslie, C.: Sequence and chromatin determinants of cell-type-specific transcription factor binding. *Genome Research* **22**(9), 1723–1734 (2012)
- [4] Luo, K., Hartemink, A.J.: Using DNase digestion data to accurately identify transcription factor binding sites. In: *Pacific Symposium on Biocomputing*, pp. 80–91. World Scientific, Singapore (2012)
- [5] Piper, J., Elze, M.C., Cauchy, P., Cockerill, P.N., Bonifer, C., Ott, S.: Wellington: a novel method for the accurate identification of digital genomic footprints from DNase-seq data. *Nucleic Acids Research* **41**(21), 201 (2013)
- [6] Sherwood, R.I., Hashimoto, T., O'Donnell, C.W., Lewis, S., Barkal, A.A., van Hoff, J.P., Karun, V., Jaakkola, T., Gifford, D.K.: Discovery of directional and nondirectional pioneer transcription factors by modeling DNase profile magnitude and shape. *Nat Biotech* **32**(2), 171–178 (2014)
- [7] Gusmao, E.G., Dieterich, C., Zenke, M., Costa, I.G.: Detection of active transcription factor binding sites with the combination of DNase hypersensitivity and histone modifications. *Bioinformatics* **30**(22), 3143–3151 (2014)
- [8] Raj, A., Shim, H., Gilad, Y., Pritchard, J.K., Stephens, M.: msCentipede: Modeling heterogeneity across genomic sites and replicates improves accuracy in the inference of transcription factor binding. *PLOS ONE* **10**(9), 1–15 (2015)
- [9] Kähärä, J., Lähdesmäki, H.: BinDNase: a discriminatory approach for transcription factor binding prediction using DNase I hypersensitivity data. *Bioinformatics* **31**(17), 2852–2859 (2015)
- [10] Kumar, S., Bucher, P.: Predicting transcription factor site occupancy using DNA sequence intrinsic and cell-type specific chromatin features. *BMC Bioinformatics* **17**(1), 4 (2016)
- [11] Jankowski, A., Tiuryn, J., Prabhakar, S.: Romulus: robust multi-state identification of transcription factor binding sites from DNase-seq data. *Bioinformatics* **32**(16), 2419–2426 (2016)
- [12] Quang, D., Xie, X.: FactorNet: a deep learning framework for predicting cell type specific transcription factor binding from nucleotide-resolution sequential data. *bioRxiv* (2017). doi:10.1101/151274



- [13] Liu, S., Zibetti, C., Wan, J., Wang, G., Blackshaw, S., Qian, J.: Assessing the model transferability for prediction of transcription factor binding sites based on chromatin accessibility. *BMC Bioinformatics* **18**(1), 355 (2017)
- [14] Qin, Q., Feng, J.: Imputation for transcription factor binding predictions based on deep learning. *PLOS Computational Biology* **13**(2), 1–20 (2017)
- [15] Schmidt, F., Gasparoni, N., Gasparoni, G., Gianmoena, K., Cadenas, C., Polansky, J.K., Ebert, P., Nordström, K., Barann, M., Sinha, A., Fröhler, S., Xiong, J., Dehghani Amirabad, A., Behjati Ardakani, F., Hutter, B., Zipprich, G., Felder, B., Eils, J., Brors, B., Chen, W., Hengstler, J.G., Hamann, A., Lengauer, T., Rosenstiel, P., Walter, J., Schulz, M.H.: Combining transcription factor binding affinities with open-chromatin data for accurate gene expression prediction. *Nucleic Acids Research* **45**(1), 54–66 (2017)
- [16] Chen, X., Yu, B., Carriero, N., Silva, C., Bonneau, R.: Mocap: large-scale inference of transcription factor binding sites from chromatin accessibility. *Nucleic Acids Research* **45**(8), 4315–4329 (2017)
- [17] Kharchenko, P.V., Tolstorukov, M.Y., Park, P.J.: Design and analysis of ChIP-seq experiments for DNA-binding proteins. *Nat Biotech* **26**(12), 1351–1359 (2008)
- [18] Matys, V., Kel-Margoulis, O.V., Fricke, E., Liebich, I., Land, S., Barre-Dirrie, A., Reuter, I., Chekmenev, D., Krull, M., Hornischer, K., Voss, N., Stegmaier, P., Lewicki-Potapov, B., Saxel, H., Kel, A.E., Wingender, E.: TRANSFAC(R) and its module TRANSCOMP(R): transcriptional gene regulation in eukaryotes. *Nucleic Acids Research* **34**(suppl.1), 108–110 (2006)
- [19] Mathelier, A., Fornes, O., Arenillas, D.J., Chen, C.-y., Denay, G., Lee, J., Shi, W., Shyr, C., Tan, G., Worsley-Hunt, R., Zhang, A.W., Parey, F., Lenhard, B., Sandelin, A., Wasserman, W.W.: Jaspas 2016: a major expansion and update of the open-access database of transcription factor binding profiles. *Nucleic Acids Research* **44**(D1), 110–115 (2016)
- [20] Newburger, D.E., Bulyk, M.L.: UniPROBE: an online database of protein binding microarray data on protein-DNA interactions. *Nucleic Acids Research* **37**(suppl 1), 77–82 (2009)
- [21] Weirauch, M.T., Yang, A., Albu, M., Cote, A.G., Montenegro-Montero, A., Drewe, P., Najafabadi, H.S., Lambert, S.A., Mann, I., Cook, K., Zheng, H., Goity, A., van Bakel, H., Lozano, J.-C., Galli, M., Lewsey, M.G., Huang, E., Mukherjee, T., Chen, X., Reece-Hoyes, J.S., Govindarajan, S., Shaulsky, G., Walkout, A.J.M., Bouget, F.-Y., Ratsch, G., Larrondo, L.F., Ecker, J.R., Hughes, T.R.: Determination and inference of eukaryotic transcription factor sequence specificity. *Cell* **158**(6), 1431–1443 (2014)
- [22] Wang, J., Zhuang, J., Iyer, S., Lin, X., Whitfield, T.W., Greven, M.C., Pierce, B.G., Dong, X., Kundaje, A., Cheng, Y., Rando, O.J., Birney, E., Myers, R.M., Noble, W.S., Snyder, M., Weng, Z.: Sequence features and chromatin structure around

the genomic regions bound by 119 human transcription factors. *Genome Research* **22**(9), 1798–1812 (2012)

- [23] Kheradpour, P., Kellis, M.: Systematic discovery and characterization of regulatory motifs in ENCODE TF binding experiments. *Nucleic Acids Research* **42**(5), 2976–2987 (2014)
- [24] Heinz, S., Benner, C., Spann, N., Bertolino, E., Lin, Y.C., Laslo, P., Cheng, J.X., Murre, C., Singh, H., Glass, C.K.: Simple combinations of lineage-determining transcription factors prime cis-regulatory elements required for macrophage and B cell identities. *Molecular Cell* **38**(4), 576–589 (2010)
- [25] Kulakovskiy, I.V., Vorontsov, I.E., Yevshin, I.S., Soboleva, A.V., Kasianov, A.S., Ashoor, H., Ba-alawi, W., Bajic, V.B., Medvedeva, Y.A., Kolpakov, F.A., Makeev, V.J.: HOCOMOCO: expansion and enhancement of the collection of transcription factor binding sites models. *Nucleic Acids Research* **44**(D1), 116–125 (2016)
- [26] Grau, J., Grosse, I., Posch, S., Keilwagen, J.: Motif clustering with implications for transcription factor interactions. In: German Conference on Bioinformatics. *PeerJ Preprints*, vol. 3, p. 1601 (2015)
- [27] Keilwagen, J., Grau, J.: Varying levels of complexity in transcription factor binding motifs. *Nucleic Acids Research* (2015)
- [28] Grau, J., Posch, S., Grosse, I., Keilwagen, J.: A general approach for discriminative de novo motif discovery from high-throughput data. *Nucleic Acids Research* **41**(21), 197 (2013)
- [29] Whitaker, J.W., Chen, Z., Wang, W.: Predicting the human epigenome from DNA motifs. *Nat Meth* **12**(3), 265–272 (2015)
- [30] Roos, T., Wettig, H., Grünwald, P., Myllymäki, P., Tirri, H.: On discriminative Bayesian network classifiers and logistic regression. *Machine Learning* **59**(3), 267–296 (2005)
- [31] Grau, J.: Discriminative Bayesian principles for predicting sequence signals of gene regulation. PhD thesis, Martin Luther University Halle–Wittenberg (April 2010)
- [32] Grau, J., Keilwagen, J., Gohr, A., Haldemann, B., Posch, S., Grosse, I.: Jstacs: A Java framework for statistical analysis and classification of biological sequences. *Journal of Machine Learning Research* **13**(Jun), 1967–1971 (2012)
